# Supplementary material
Source: publisher figshare collection journal article supplement (https://diabetesjournals.figshare.com/articles/dataset/_/24114711)
Supplement: Supplementary file 1 [file 1]

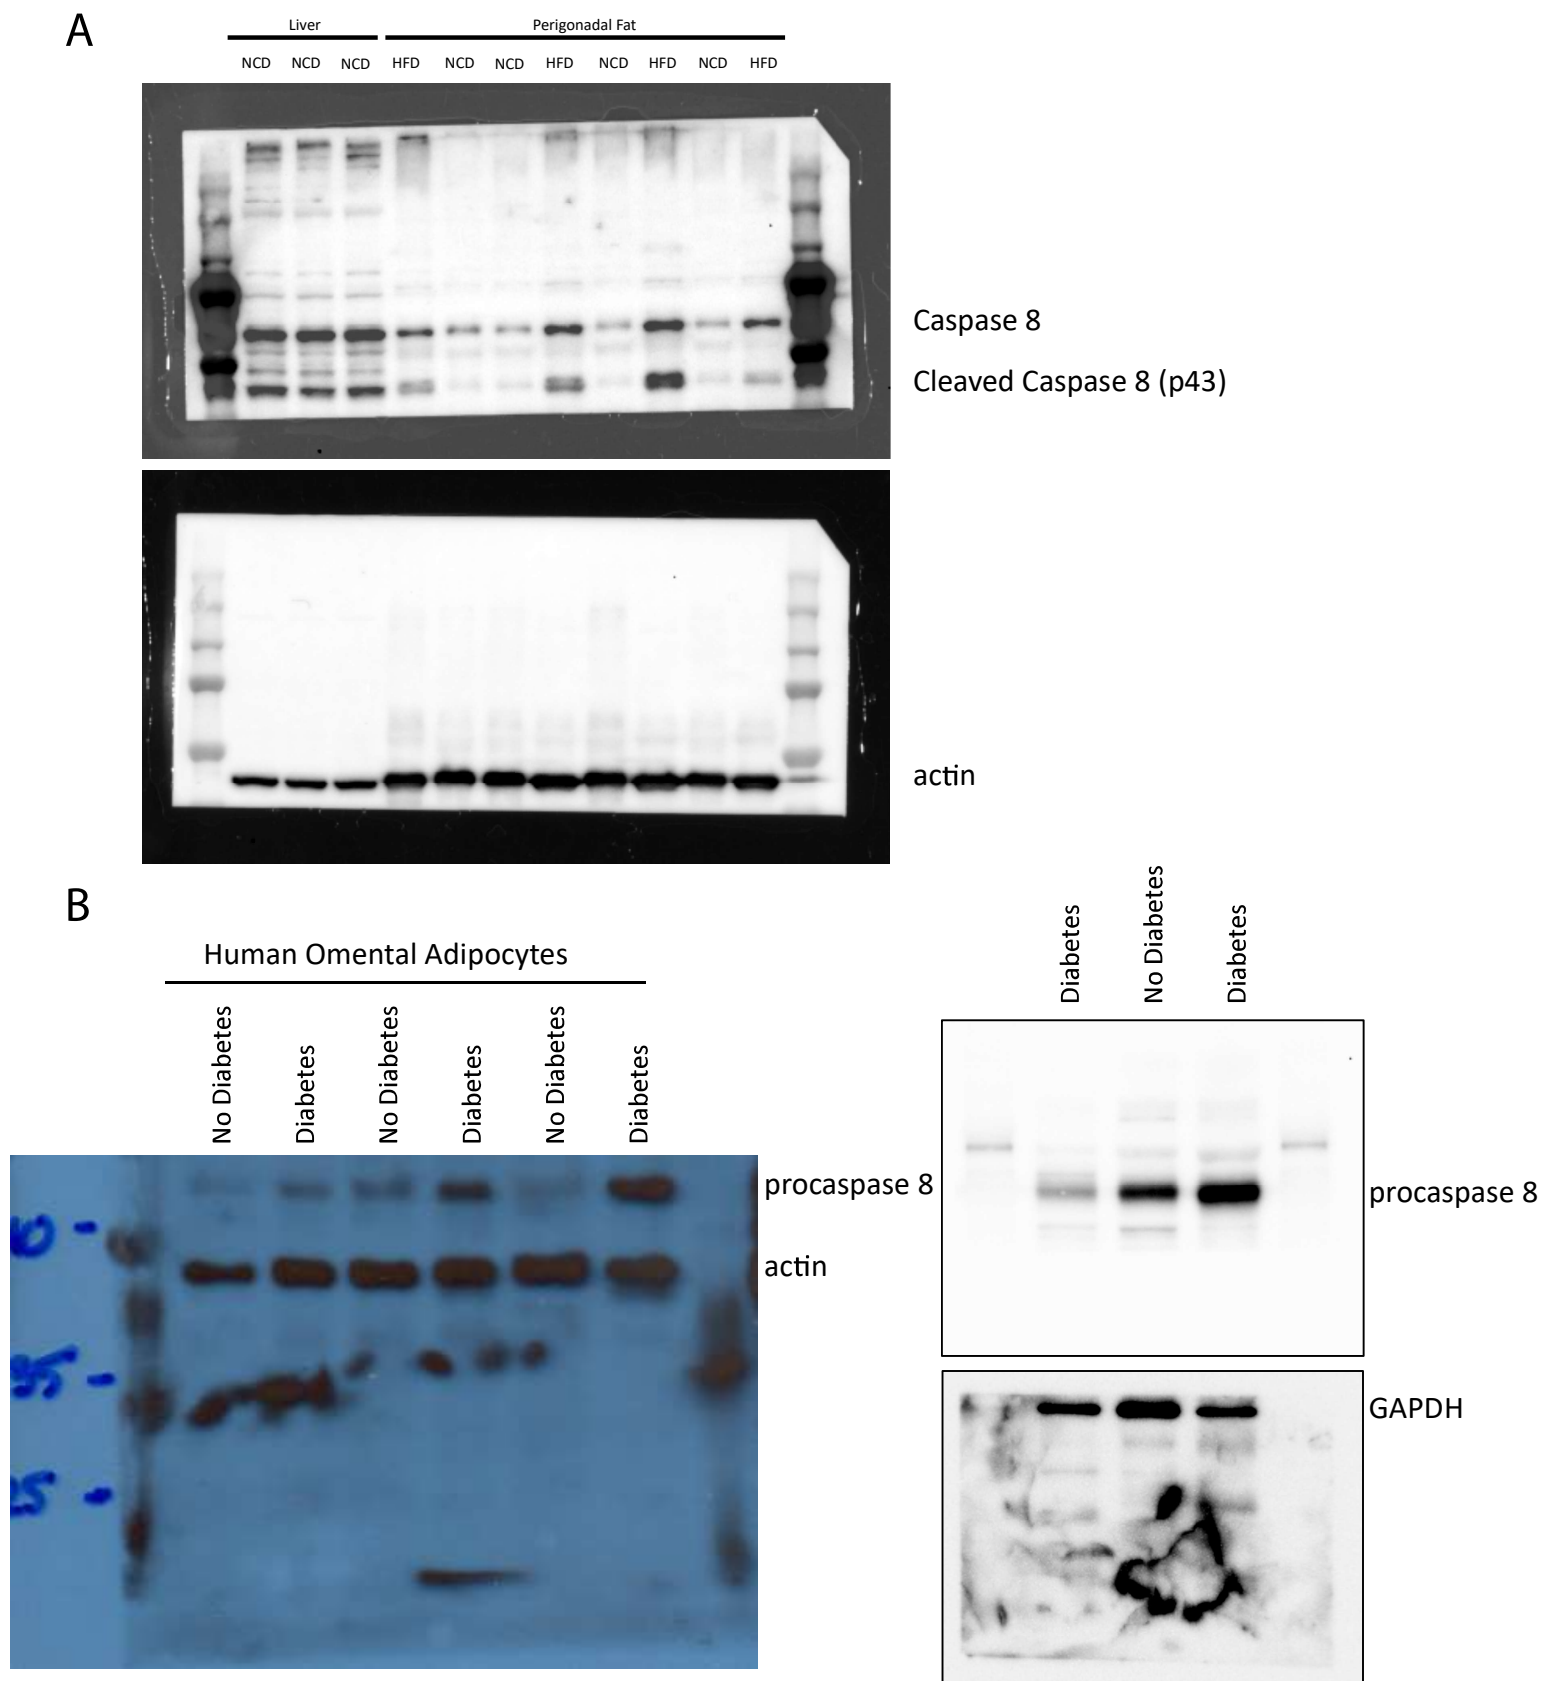

**Supplementary Figure 1. Caspase 8 increases in adipose tissue with obesity and type 2 diabetes.** (A) Western blots of caspase 8 protein levels in perigonadal adipose tissue from mice fed chow diet (NCD, n=4) or high fat diet (HFD, n=5). (B) Western blots of caspase 8 protein levels in omental adipocytes from humans without (n=4) or with type 2 diabetes (n=5).

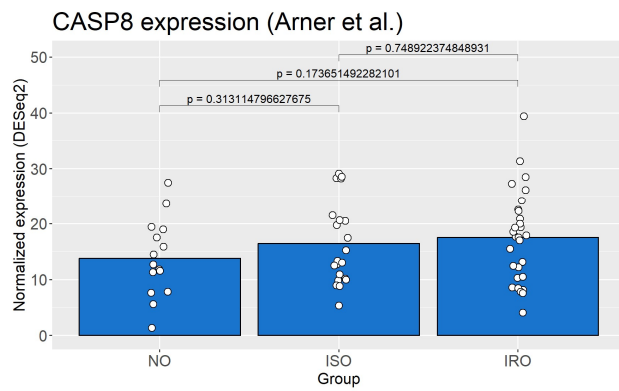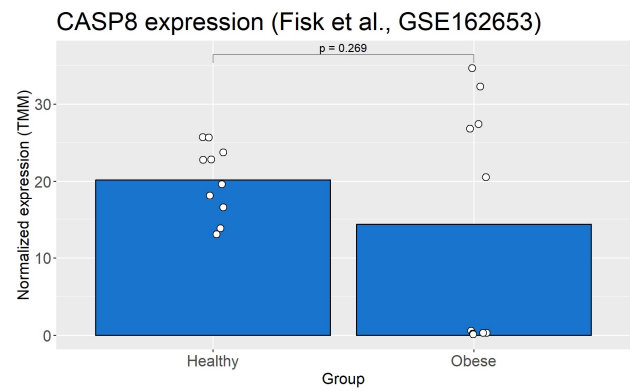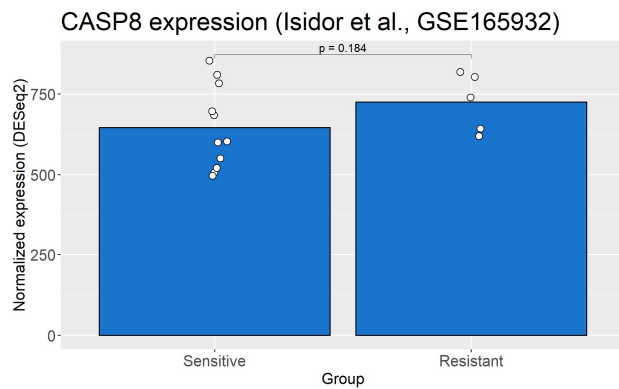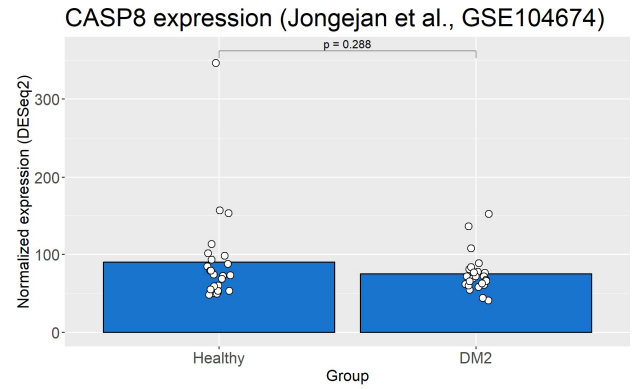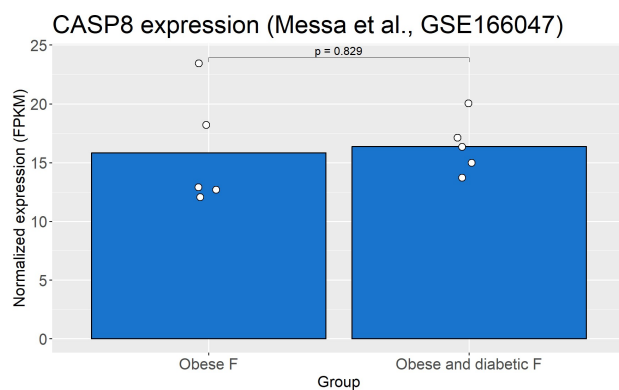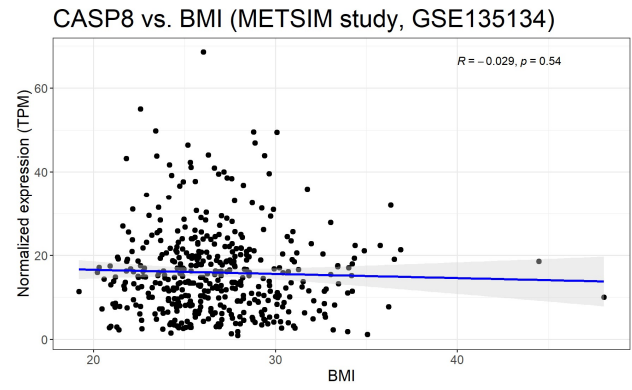

**Supplementary Figure 2. Caspase 8 protein not mRNA increases in adipose tissue with obesity and type 2 diabetes.** Analysis of caspase 8 mRNA expression in adipocytes from people with or without obesity or insulin resistance. Not obese (NO), insulin sensitive with obesity (ISO), insulin resistant with obesity (IRO), type 2 diabetes (DM2), female (F). p values shown using Student's t-test for two groups or Dunnett's test for three groups.

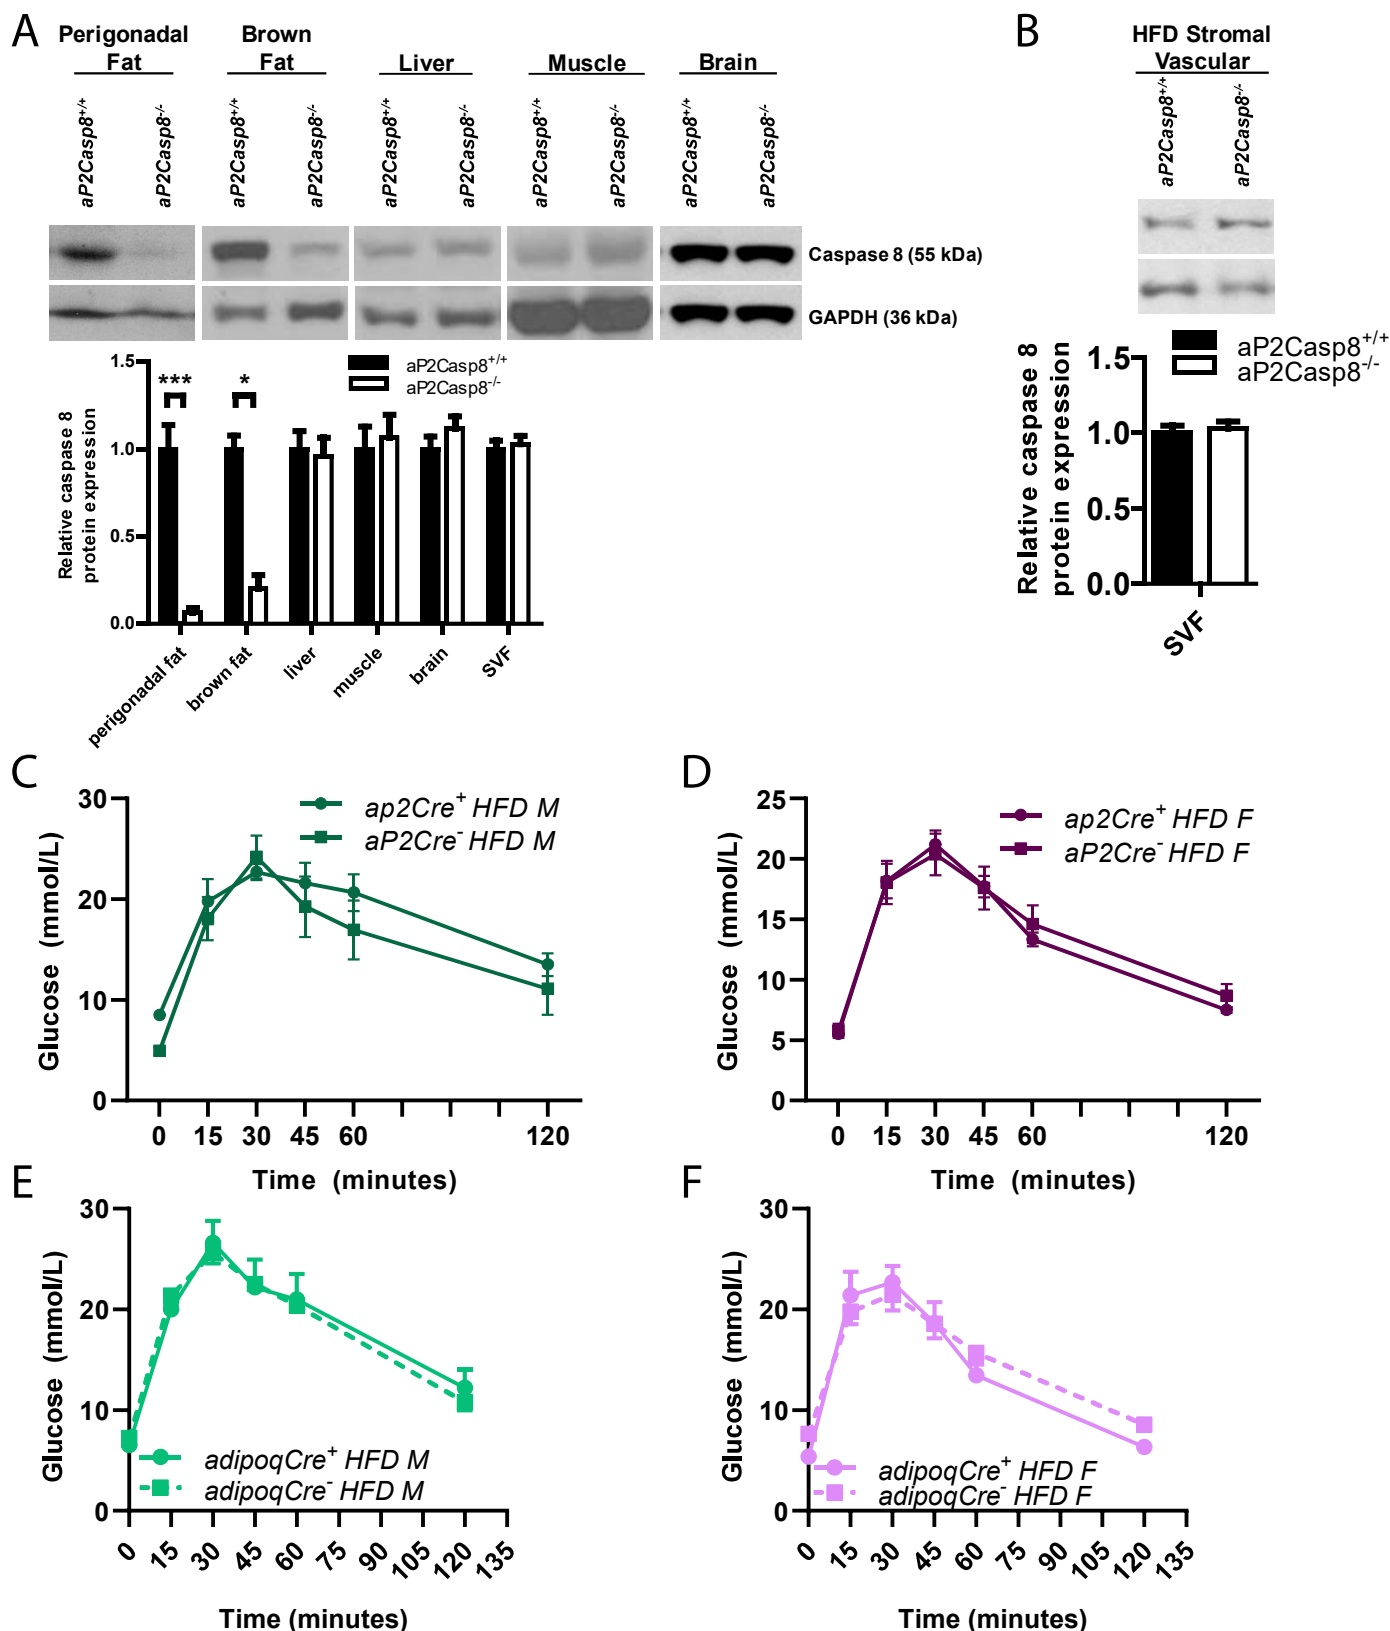

**Supplementary Figure 3. Caspase 8 is deleted in *aP2Casp8*<sup>-/-</sup> mouse adipose tissue. (A)**

Representative Western blot and quantification of caspase 8 protein expression in white perigonadal fat, brown interscapular fat, liver, muscle and brain from *aP2Casp8*<sup>-/-</sup> compared to *aP2Casp8*<sup>+/+</sup> mice (n=3-6). **(B)** Representative Western blot and quantification of caspase 8 protein expression in perigonadal fat stromal vascular fraction (containing macrophages) from HFD-fed mice (n=3). **(C-F)** Intraperitoneal (IP) glucose (1 g/kg) tolerance test in male (n=6,6 for *aP2Cre*, n=6,5 for *adipoqCre*) **(C,E)** and female **(D,F)** *aP2Cre*<sup>+</sup> and *aP2Cre*<sup>-</sup> or *adipoqCre*<sup>+</sup> and *adipoqCre*<sup>-</sup> (n=6,5 for males, n=6,6 for females) mice fed HFD. Data are mean ± SEM.

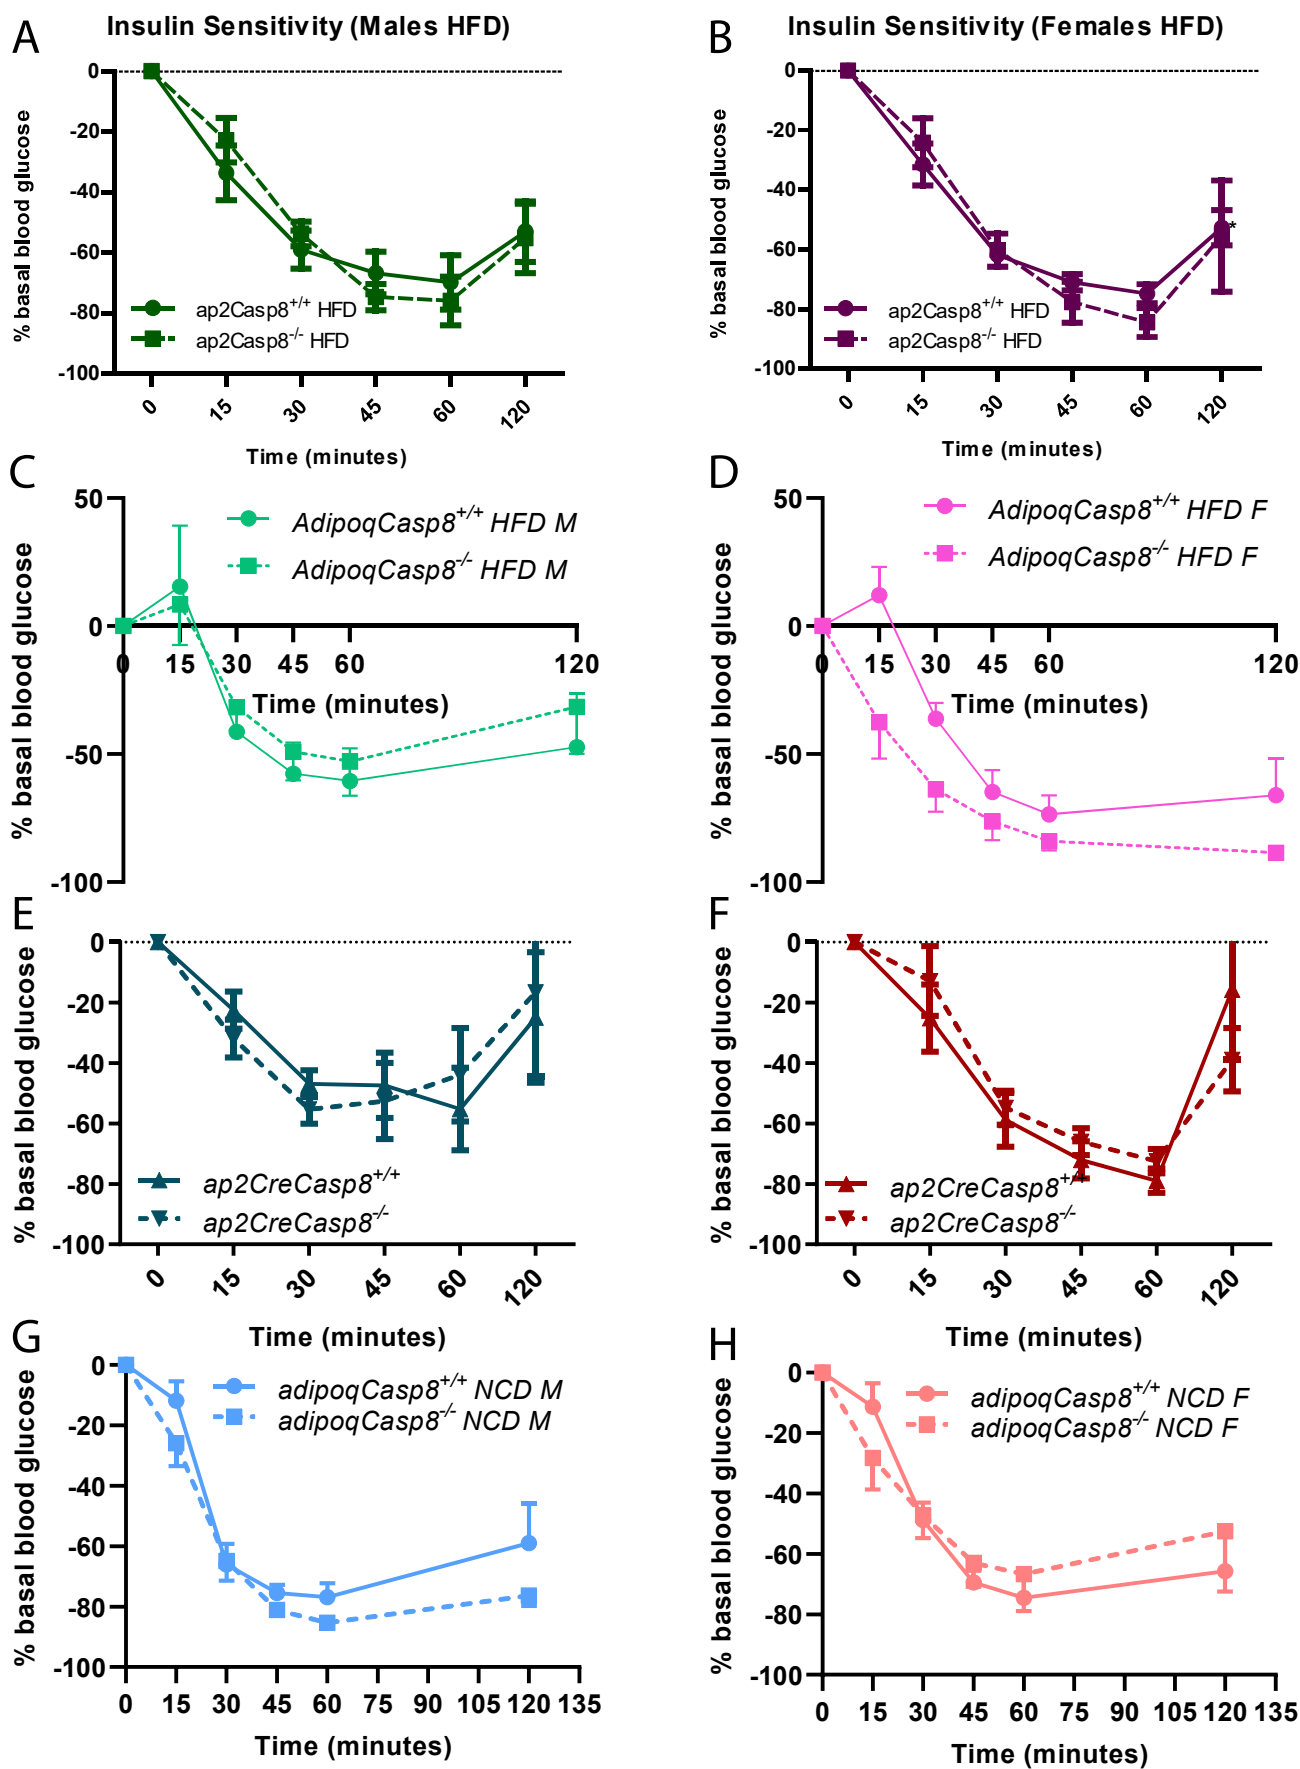

**Supplementary Figure 4. Disruption of adipocyte caspase 8 improves glucose tolerance.** (A-D) Insulin (1.0 U/kg) tolerance test in male (A,C) and female (B,D) *aP2Casp8*<sup>-/-</sup> and *adipoqCre*<sup>+</sup>*Casp8*<sup>-/-</sup> mice fed HFD (n=6-7). (E-H) Insulin (1.0 U/kg) tolerance test in male (E,G) and female (F,H) *aP2Casp8*<sup>-/-</sup> and *adipoqCre*<sup>+</sup>*Casp8*<sup>-/-</sup> mice fed chow diet (n=5-8).

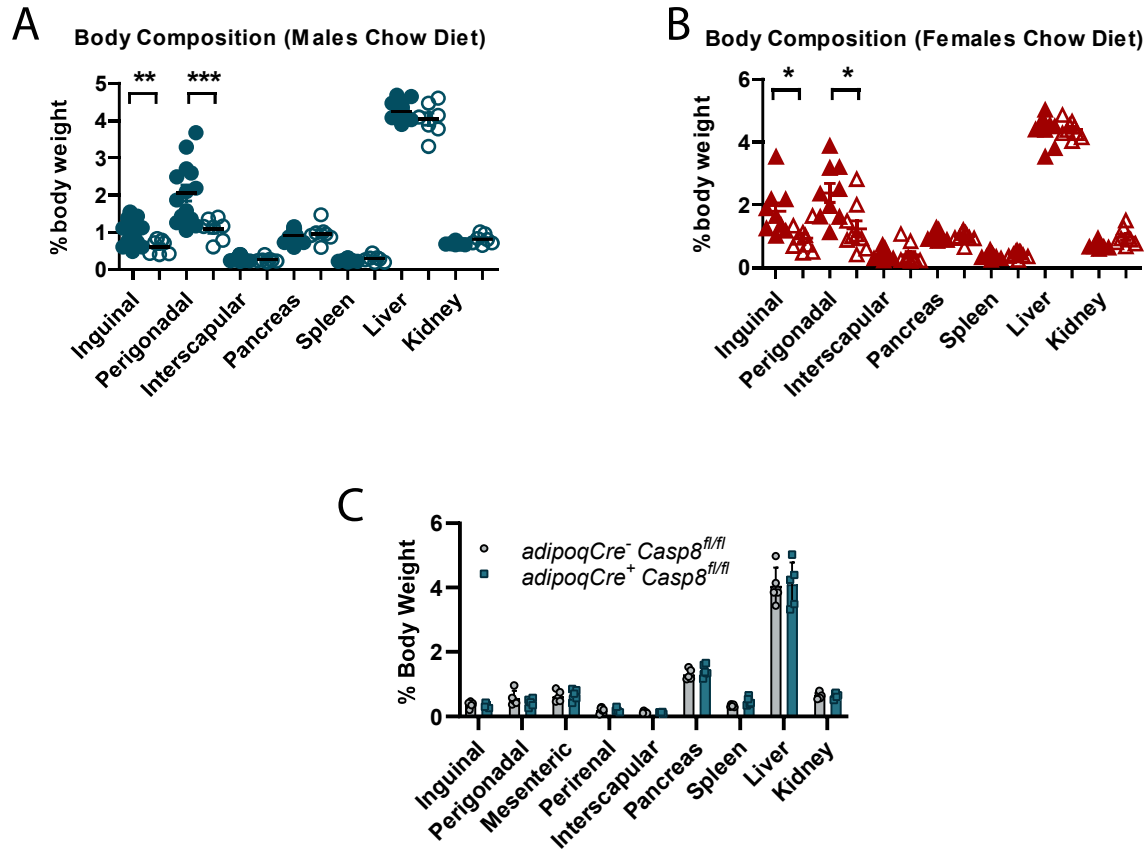

**Supplementary Figure 5. Adipocyte-specific caspase 8 knockdown protects mice from weight gain on HFD. (A-C) Body composition by necropsy of male (A,C) and female (B) *aP2Casp8<sup>-/-</sup>* (A,B) and *adipoqCre<sup>+</sup>Casp8<sup>-/-</sup>* (C) mice fed chow diet (n=7-14 for *aP2Casp8<sup>-/-</sup>* and n=5 for *adipoqCre<sup>+</sup>Casp8<sup>-/-</sup>* mice). Data are mean  $\pm$  SEM. \*  $p \leq 0.05$ , \*\*  $p \leq 0.01$ , \*\*\*  $p \leq 0.001$  using Student's t-test.**

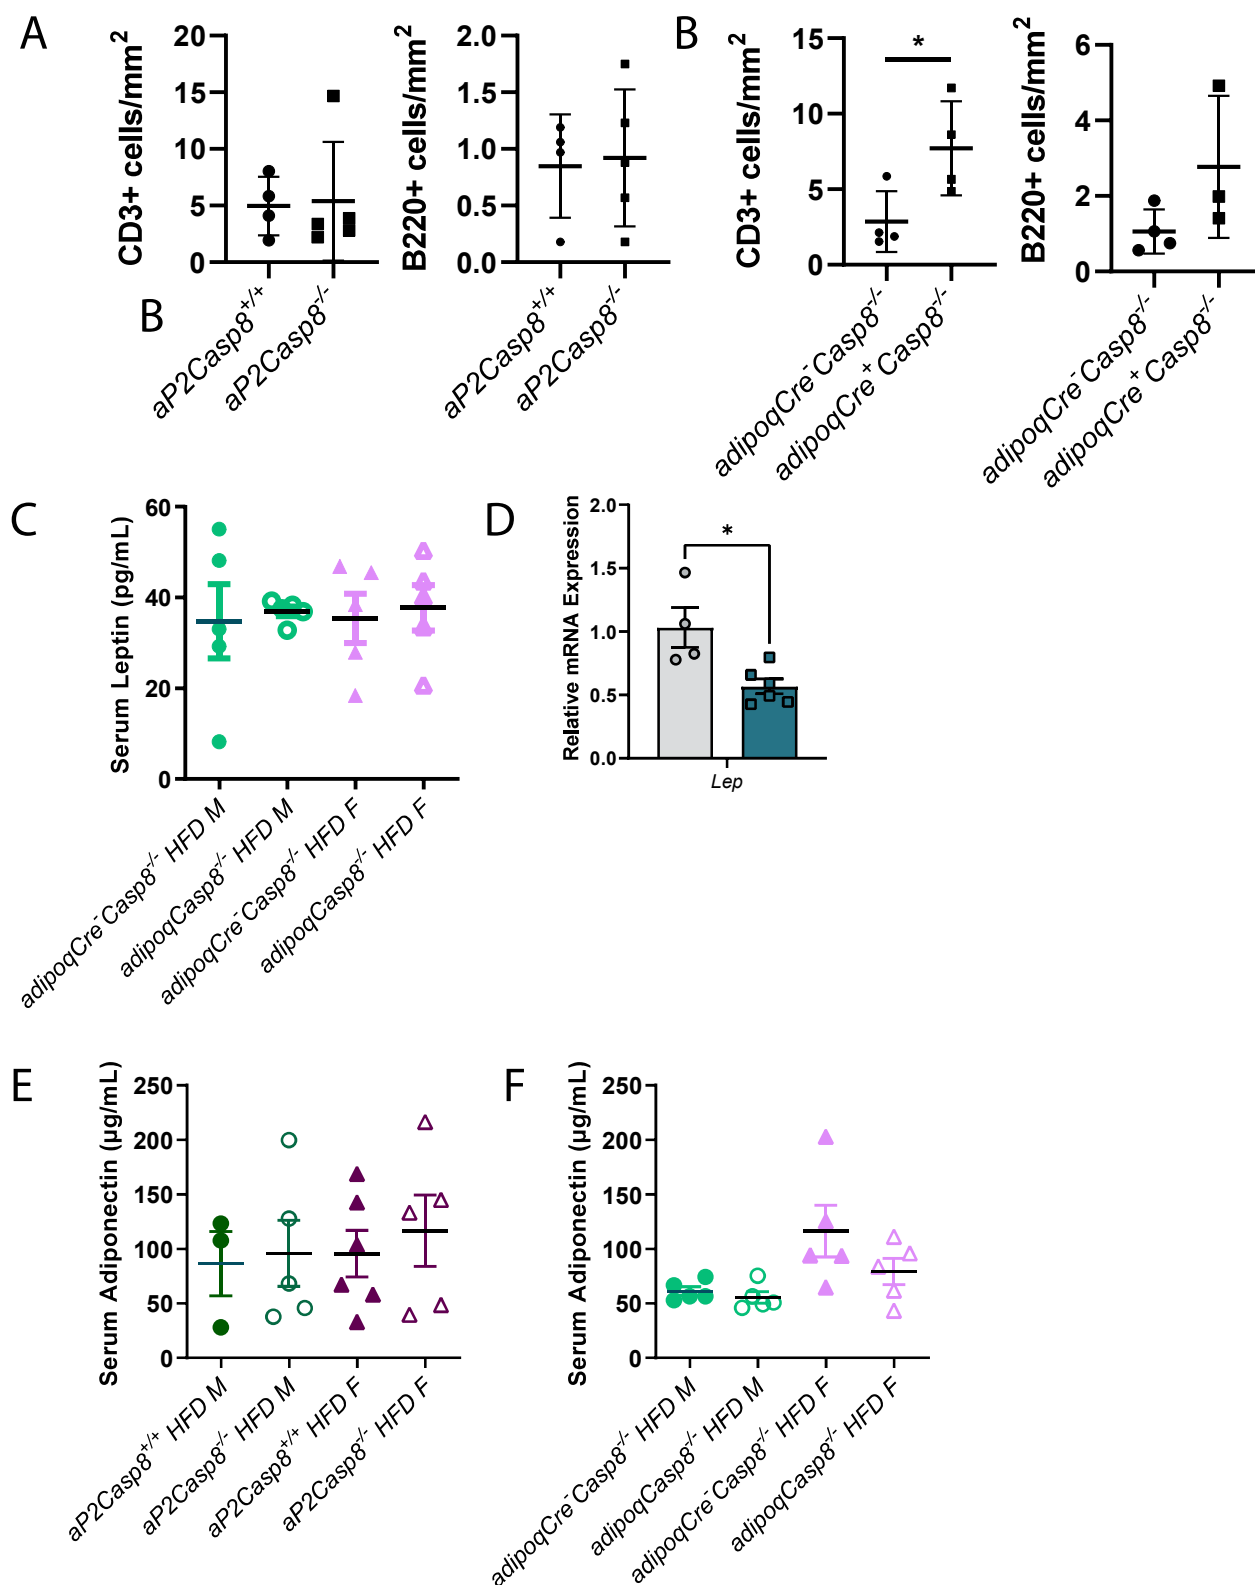

**Supplementary Figure 6. Role of adipocyte caspase 8 in metabolic inflammation.** (A,B) CD3 and B220 positive cells in perigonadal fat sections from HFD-fed mice stained by immunohistochemistry (n=4-6). (C) Serum leptin levels in male and female *adipoqCre<sup>+</sup>Casp8<sup>-/-</sup>* HFD-fed mice (n=3-6). (D) Expression of leptin in perigonadal adipose tissue from *adipoqCre<sup>+</sup>Casp8<sup>-/-</sup>* compared to control HFD-fed mice (n=4-6). (E,F) Adiponectin serum levels in male and female *aP2Casp8<sup>-/-</sup>* (E) or *adipoqCre<sup>+</sup>Casp8<sup>-/-</sup>* (F) HFD-fed mice (n=3-6). Data are mean ± SEM. \*  $p \leq 0.05$  using Student's t-test.

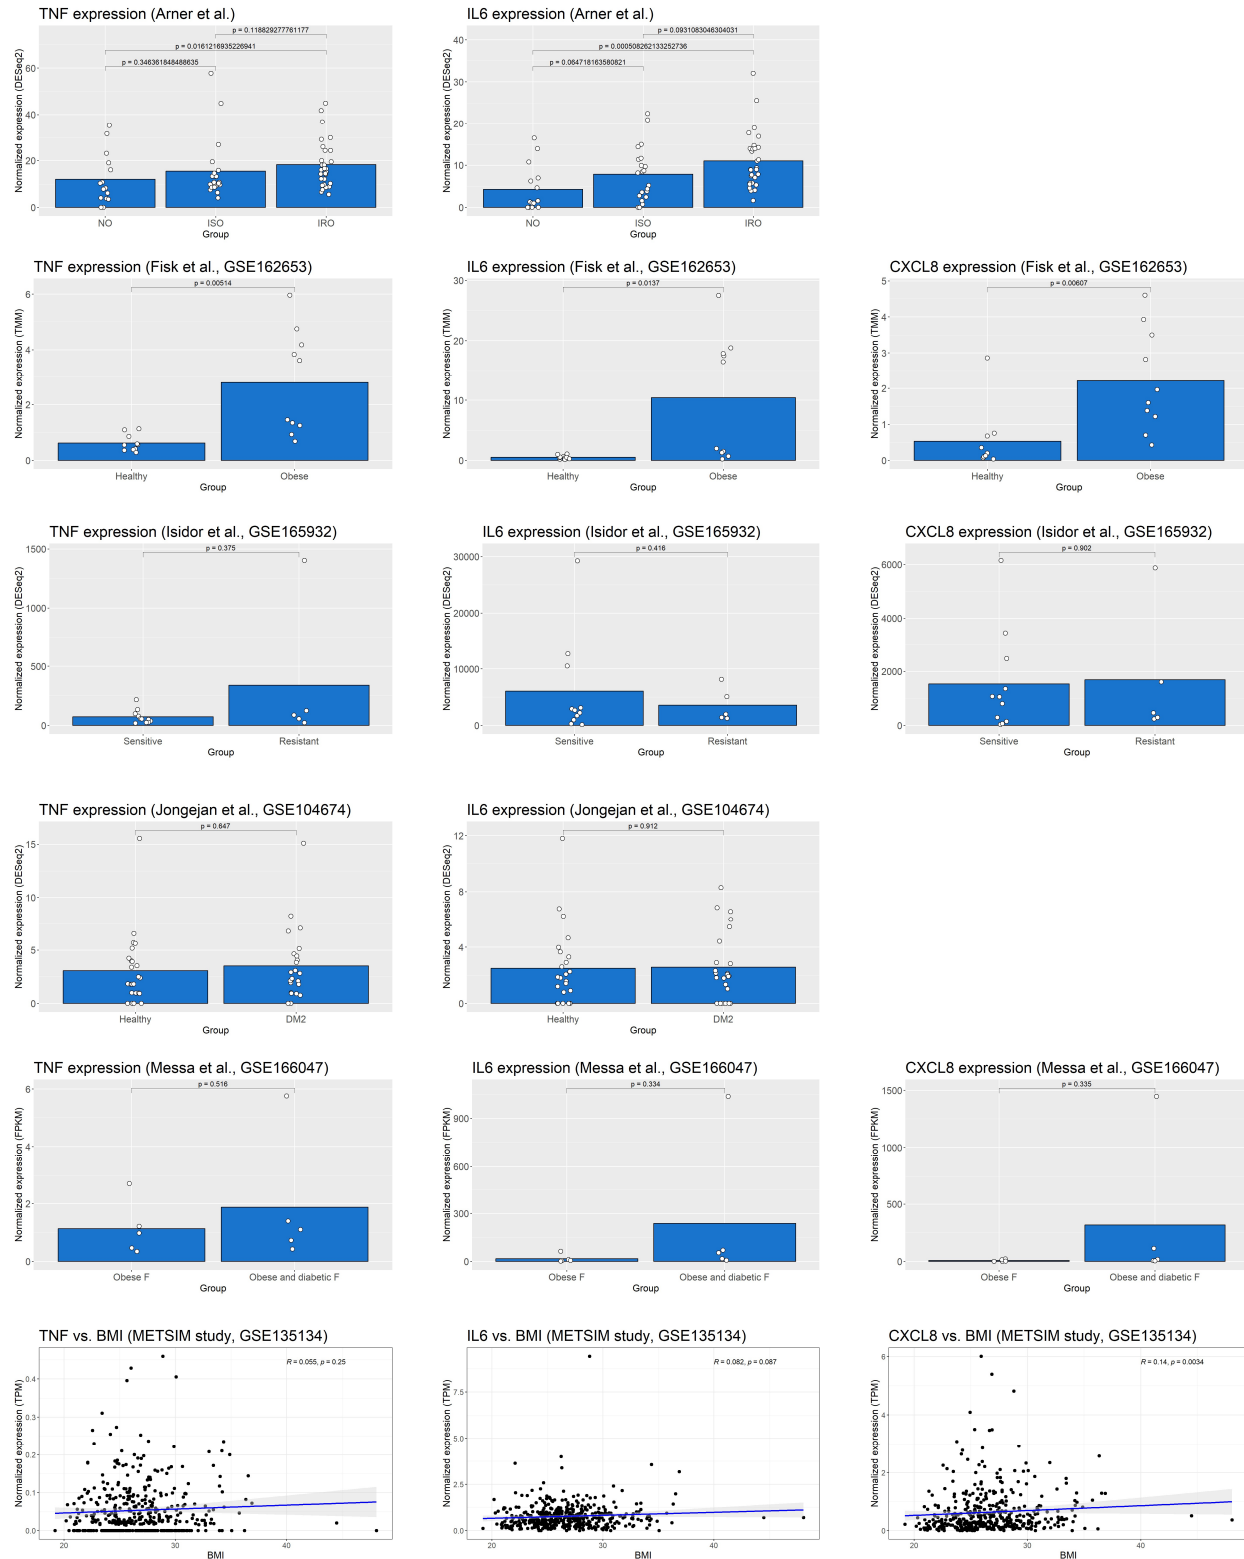

**Supplementary Figure 7. Adipocyte NF- $\kappa$ B target gene expression with obesity and type 2 diabetes.** Analysis of NF- $\kappa$ B target gene mRNA expression in adipocytes from people with or without obesity or insulin resistance. Not obese (NO), insulin sensitive with obesity (ISO), insulin resistant with obesity (IRO), type 2 diabetes (DM2), female (F). p values shown using Student's t-test for two groups or Dunnett's test for three groups.

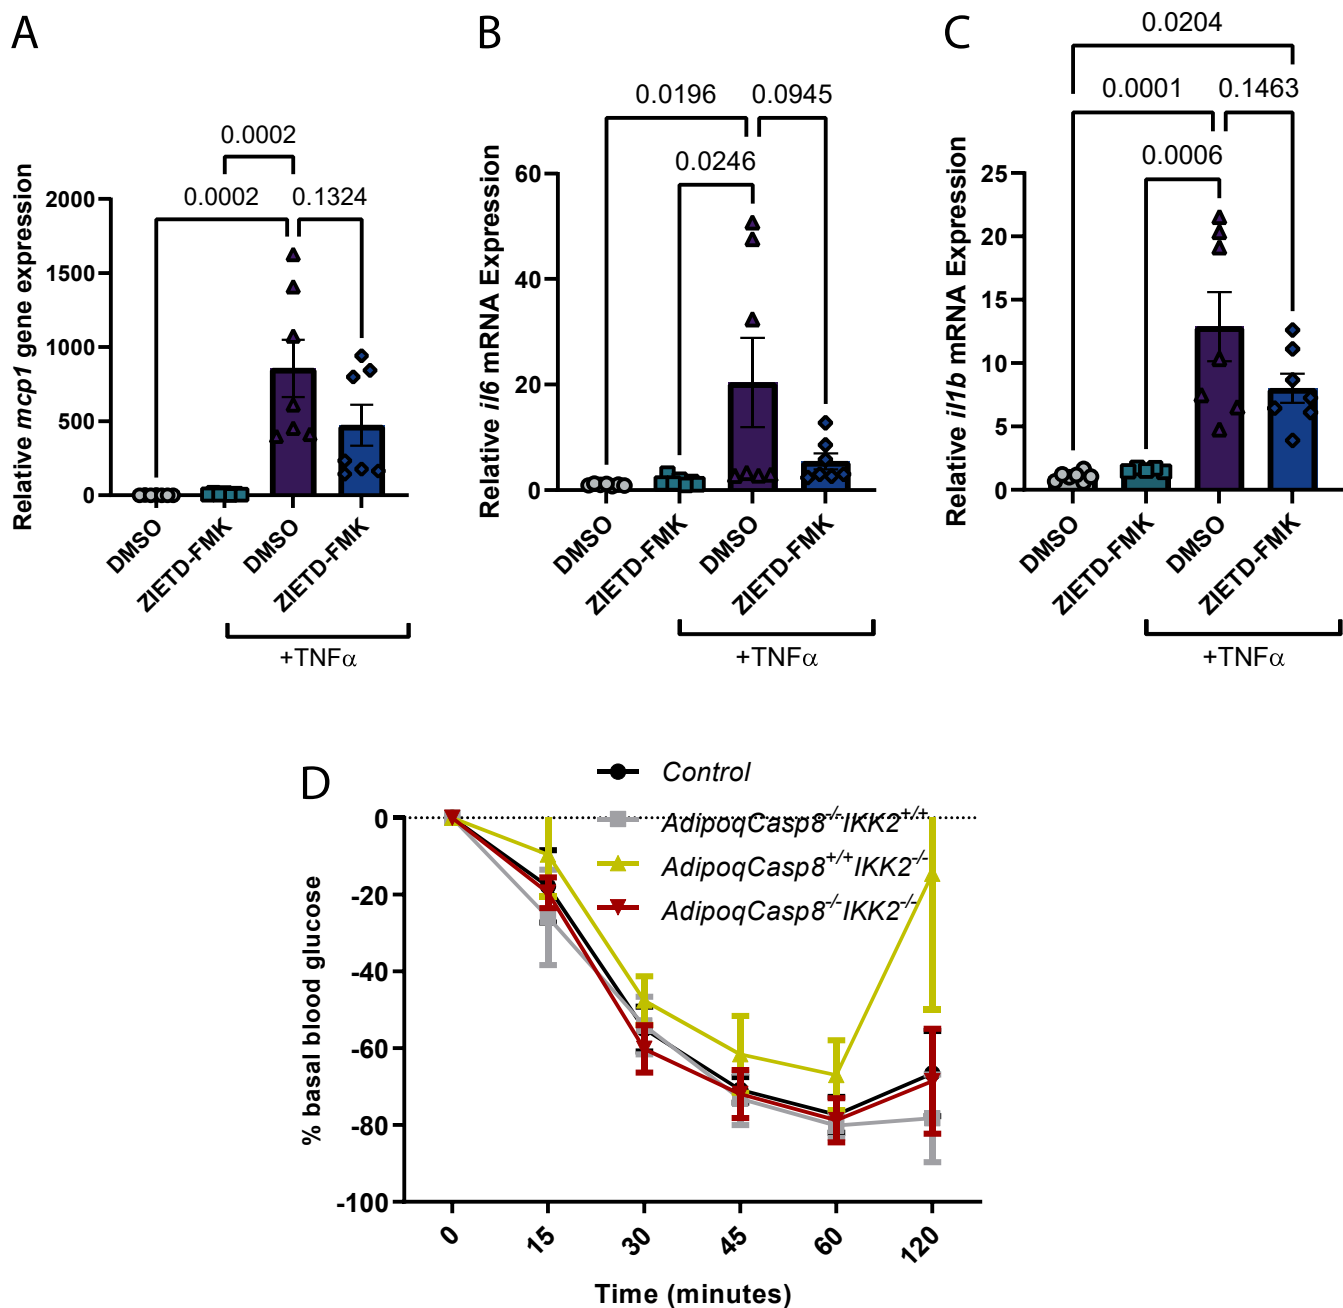

**Supplementary Figure 8. Caspase 8 regulates NF- $\kappa$ B signaling in adipocytes to promote glucose intolerance.** (A-C) Expression of *mcp1* (A), *il6* (B) and *il1b* (C) genes in 3T3-L1 adipocytes stimulated with  $TNF\alpha$  and treated with or without caspase 8 inhibitor ZIETD-FMK (n=7 replicates, experiment repeated 3 times). (D) Insulin (1.0 U/kg) tolerance test in *adipoqCasp8<sup>-/-</sup> adipoqIKK2<sup>-/-</sup>* and control mice fed HFD (n=4-8). Data are mean  $\pm$  SEM. p calculated using Student's t-test.



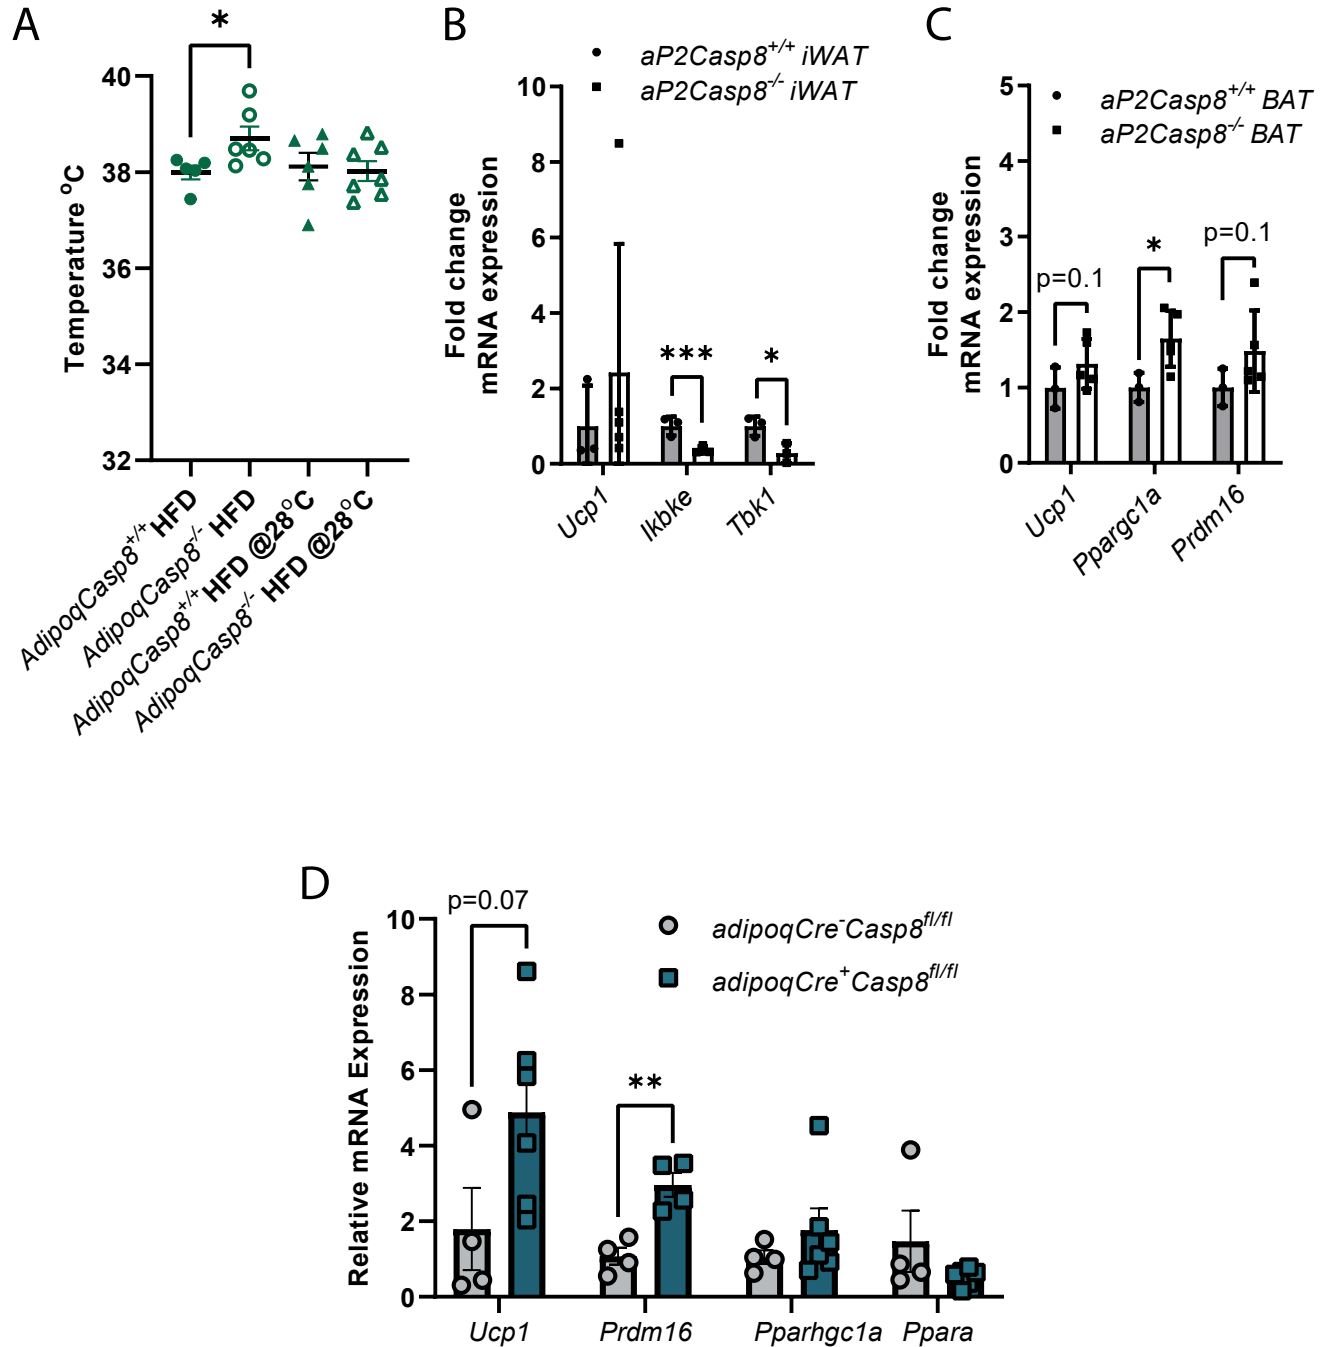

**Supplementary Figure 9. Knockdown of adipocyte caspase 8 is associated with increased energy expenditure.** (A) Core body temperature in *adipoqCre<sup>+</sup>Casp8<sup>-/-</sup>* and control mice on HFD housed at 21°C and 28°C (n=5-6). (B-D) Expression of genes involved in thermogenesis in inguinal fat (iWAT) (B), interscapular brown fat (BAT) (C) from *aP2Casp8<sup>-/-</sup>* mice and perigonadal fat from *adipoqCre<sup>+</sup>Casp8<sup>-/-</sup>* mice (D) fed HFD (n=3-6). Data are mean ± SEM. \* p ≤ 0.05, \*\* p ≤ 0.01. \*\*\* p ≤ 0.001 using Student's t-test.

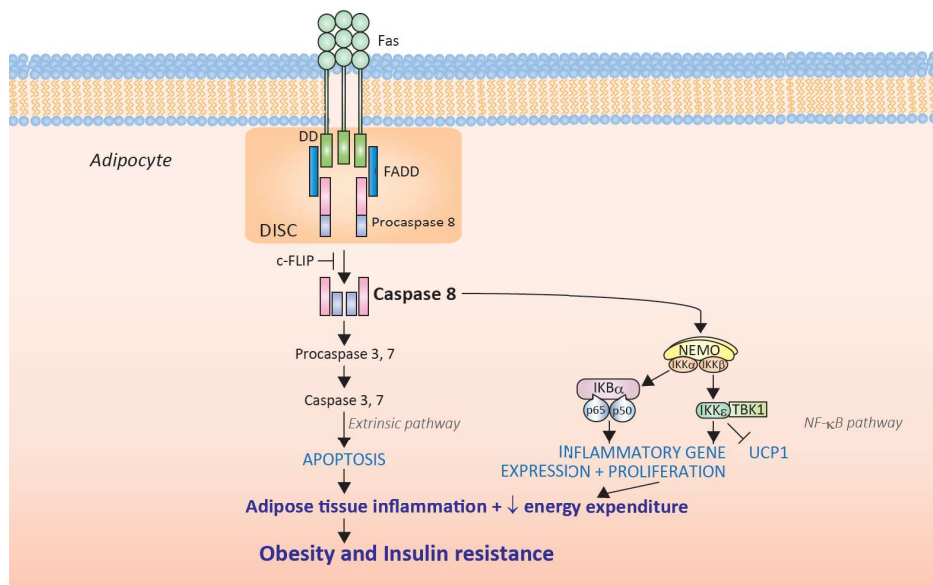

**Supplementary Figure 10. Proposed working model.**
