# Supplementary material
Source: publisher figshare collection journal article supplement (https://diabetesjournals.figshare.com/articles/dataset/_/24114711)
Supplement: Supplementary file 1 [file 1]

## Sheet: Sheet1
GEO ID	PMID	First author	Source of adipose tissue	Clinical information available
NA	27545890	Ryden	Subcutaneous	BMI category, insulin sensitivity
GSE162653	35247847	Fisk	Subcutaneous	BMI category
GSE165932	34799672	Isidor	Omental	Gender (all males), insulin sensitivity, BMI category
GSE104674	30737520	Jongejan	Subcutaneous	Gender (all males), diabetes status, BMI category, Zeitgeber time
GSE166047	34901353	Messa	Subcutaneous	Gender, diabetes category, BMI category
GSE135134	35589964	El-Sayed (METSIM)	Subcutaneous	All men, BMI
