# Supplementary material
Source: publisher figshare collection journal article supplement (https://diabetesjournals.figshare.com/articles/dataset/_/24114711)
Supplement: Supplementary file 2 [file 1]

Supplemental Table 1. Sequence of primers used for quantitative RT-PCR

| Primer         | Sequence                       |
|----------------|--------------------------------|
| 18s forward    | 5'-AGTCCCTGCCCTTTGTACACA-3'    |
| 18s reverse    | 5'-CGATCCGAGGGCCTCACTA-3'      |
| Adipoq forward | 5'-TGTCCCCATGAGTACCAGACTA-3'   |
| Adipoq reverse | 5'-GTAGCATCCTGAGCCCTTTT-3'     |
| Cebpa forward  | 5'-AAGAACAGCAACGAGTACCGG-3'    |
| Cebpa reverse  | 5'-CATTGTCACTGGTCAGCTCCA-3'    |
| Emr1 forward   | 5'-CTTTGGCTATGGGCTTCCAGTC-3'   |
| Emr1 reverse   | 5'-GCAAGGAGGACAGAGTTTATCGTG-3' |
| Emr1 forward   | 5'-CCCCAGTGTCTTACAGAGTG-3'     |
| Emr1 reverse   | 5'-GTGCCCAGAGTGGATGTCTC-3'     |
| Fabp4 forward  | 5'-GACGACAGGAAGGTGAAGAG-3'     |
| Fabp4 reverse  | 5'-ACATTCCACCACCAGCTTGT-3'     |
| Srebf1 forward | 5'-GATCAAAGAGGAGCCAGTGC-3'     |
| Srebf1 reverse | 5'-TAGATGGTGGCTGCTGAGTG-3'     |
| Pparg forward  | 5'-GCCCTTTGGTGACTTTATGG-3'     |
| Pparg reverse  | 5'-CAGCAGGTTGTCTTGGATGT-3'     |
| Adipoq forward | 5'-GGAAC TTGTGCAGGTTGGAT-3'    |
| Adipoq reverse | 5'-GCTTCTCCAGGCTCTCCTTT-3'     |
| Ikke forward   | 5'-ACTTGGAGTGCAGGAAGAAGAT-3'   |
| Ikke reverse   | 5'-CACCTCCCCGGATTTCTTGT-3'     |
| Il6 forward    | 5'-CTCTGGGAAATCGTGGAATG-3'     |

|                  |                                |
|------------------|--------------------------------|
| Il6 reverse      | 5'-AAGTGCATCATCGTTGTTCATACA-3' |
| Lep forward      | 5'-TTCACACACGCAGTCGGTAT-3'     |
| Lep reverse      | 5'-GCTGGTGAGGACCTGTTGAT-3'     |
| Mcp-1 forward    | 5'-ACCTGCTGCTACTCATTACACC-3'   |
| Mcp-1 reverse    | 5'-AGCTTGGTGACAAAACTACAG-3'    |
| Ppargc1a forward | 5'-TGGAGTGACATAGAGTGTGCTG-3'   |
| Ppargc1a reverse | 5'-TTCCGATTGGTCGCTACACC-3'     |
| Tbk1 forward     | 5'-GGAAGCCGTCTGGTGCAATA-3'     |
| Tbk1 reverse     | 5'-GTGCCTGAAGACCCTGAGAAA-3'    |
| Tnfa forward     | 5'-CTGTGAAGGGAATGGGTGTT-3'     |
| Tnfa reverse     | 5'-TTGGACCCTGAGCCATAATC-3'     |
| Tnfa forward     | 5'-GCCCACGTCGTAGCAAACC-3'      |
| Tnfa reverse     | 5'-TGTCTTTGAGATCCATGCCGT-3'    |
| Ucp1 forward     | 5'-GGAGGTGTGGCAGTGTTTAT-3'     |
| Ucp1 reverse     | 5'-TTAGGGGTCGTCCCTTTCCAA-3'    |
